# Supplementary material for: Changes in microRNA (miRNA) expression during pancreatic cancer development and progression in a genetically engineered KrasG12D;Pdx1-Cre mouse (KC) model
Source: PubMed Central journal article supplement (PMC4741896; doi:10.18632/oncotarget.5641), 2015-10-19
Supplement: oncotarget-06-40295-s001.pdf [file oncotarget-06-40295-s001.pdf]

## SUPPLEMENTARY TABLES

**Supplementary Table S1: MicroRNA microarray data-global miRNA expression profiles at 25 weeks of mouse pancreatic cancer progression.**

**Supplementary Table S2: Real time primer sequences for human and mouse genes**

| S. No | Gene       | Human                           | Mouse                         |
|-------|------------|---------------------------------|-------------------------------|
| 1     | DGCR8      | F: 5'-GCTGACACCTTGAAATGCT-3'    | 5'- CCTTCACATCCTGAGCAAGC -3'  |
|       |            | R: 5'-GACATCTTGGGCTTCTTTTCG-3'  | 5'- ACTGTGCACAAGGGCTCAC -3'   |
| 2     | TARBP2     | F: 5'- CTCTGAGGAGCAGGCCTTT-3'   | 5'- TCTCTGAGGAGCAGGCTTTC -3'  |
|       |            | R: 5'- GCAGAGCCATGACACACAGT-3'  | 5'- CTGGTGGTTGCAGAACCATA -3'  |
| 3     | Ago2       | F: 5'- CCTGGTGGATAAGGAACATGA-3' | 5'- AGAACATGACAGCGCTGAAG -3'  |
|       |            | R: 5'- CGCAGAGTGTCTTGGTGAAC-3'  | 5'- AAAGTACATGGTGCAGTG -3'    |
| 4     | PRKRA      | F: 5'- TTGCCAAGGAACAAGGTTTT-3'  | 5'- CTGAGTGCCAACGGACAGTA-3'   |
|       |            | R: 5'- ATACCGGAGCCATGACAGAC-3'  | 5'-ACTGCAGAGCATTGTGAGCA-3'    |
| 5     | Dicer      | F:5'-TGCGAGAATTGCTTGAAATG-3'    | 5'-ATTGCTCGAGATGGAACCAG-3'    |
|       |            | R: 5'-CTCTGACCTTCCCGTCGTAA-3'   | 5'-CACTTCCACGGTACTCTGA-3'     |
| 6     | Drosha     | F: 5'-AATGGATGCGCTTGAAAAAT-3'   | 5'-TCAATGAACCGCTTCTGATG-3'    |
|       |            | R: 5'-TGATGCTCTCTTTCCACCT-3'    | 5'-GGGAGAAAGGATAGGCTGTG-3'    |
| 7     | Exportin-5 | F: 5'-GACCAATTCAAACGCCTCAT-3'   | 5'-AATGGAGCAGATCCCTGAAA-3'    |
|       |            | R: 5'-CCAGCATTGGCTTTGTTTTT-3'   | 5'-TTCGGAAGTGTCTCCCAAG-3'     |
| 8     | EGFR       |                                 | 5'-CTGCCGTGTCAAAGAAGACG-3'    |
|       |            |                                 | 5'-CCTCTTGGGAACAGATTGGT-3'    |
| 9     | TGFB1      |                                 | 5'-GAAGGACCTGGGTTGGAAGT-3'    |
|       |            |                                 | 5'-TGGTTGTAGAGGGCAAGGAC-3'    |
| 10    | Kras       |                                 | 5'-GAAAAGACTCCTGGCTGTGTG-3'   |
|       |            |                                 | 5'-ATGTTTTTCGAATTTCTCGGACT-3' |
| 11    | Bcl2       |                                 | 5'-CCTGGCTGTCTCTGAAGACC-3'    |
|       |            |                                 | 5'-CATATTTGTTGGGGCAGGT-3'     |
| 12    | Galactin3  |                                 | 5'-TGGGAAAGGAAGAAAGACA-3'     |
|       |            |                                 | 5'-TGCAGTAGGTGAGCATCGTT-3'    |
| 13    | CMYB       |                                 | 5'-TGTCCCAAAGCCTTACCG-3'      |
|       |            |                                 | 5'-GTCCCTGTCTTCCCACAGG-3'     |
| 14    | E2F1       |                                 | 5'-ATCCCAGTCAATCCCTGTTG-3'    |
|       |            |                                 | 5'-AACATGCTCCAGGAGTGAGTC-3'   |
| 15    | Pten       |                                 | 5'-CGATCTGACAAAGCAAACAA-3'    |
|       |            |                                 | 5'-GTTGAACTGCTAGCCTCTGGA-3'   |

(Continued)

| S. No | Gene           | Human                          | Mouse                      |
|-------|----------------|--------------------------------|----------------------------|
| 16    | Fut8           |                                | 5'-AAAATTCACTTCGGGGTGTG-3' |
|       |                |                                | 5'-GATGCAGGGTTTGCATGATT-3' |
| 17    | Cdh11          |                                | 5'-ACGCTGAAGCCTACATCCTG-3' |
|       |                |                                | 5'-TCTTTTGCCTCCTCAGGGTA-3' |
| 18    | $\beta$ -actin | F: 5'-AGTCCCTTGCCATCCTAAAAG-3' | 5'-ACTGCTCTGGCTCCTAGCAC-3' |
|       |                | R: 5'-CAATGCTATCACCTCCCCTG-3'  | 5'-ACATCTGCTGGAAGGTGGA-3'  |
